# Supplementary material for: Synthesis and Structure-Activity Relationships of Imidazole-Coumarin Conjugates against Hepatitis C Virus
Source: PubMed Central journal article supplement (PMC6273635; doi:10.3390/molecules21020228), 2016-02-18
Supplement: molecules-21-00228-s001.pdf [file molecules-21-00228-s001.pdf]

# Synthesis and Structure-Activity Relationship of Imidazole-Coumarin Conjugates against Hepatitis C Virus

Shwu-Chen Tsay, Shu-Yu Lin, Wen-Chieh Huang, Ming-Hua Hsu, Kuo Chu Hwang, Chun-Cheng Lin, Jia-Cherng Horng, I-Chia Chen, Jih Ru Hwu, Fa-Kuen Shieh, Pieter Leyssen and Johan Neyts

Table S1. Compound Purity by HPLC.

| Compound | Gradient A/B | Purity (%) | $t_R$ (min) |
|----------|--------------|------------|-------------|
| 3a       | 20:80        | 98.5       | 7.52        |
| 3b       | 20:80        | 99.0       | 8.02        |
| 3c       | 20:80        | 98.6       | 9.58        |
| 3d       | 20:80        | 98.8       | 8.55        |
| 3e       | 20:80        | 99.6       | 7.83        |
| 3f       | 20:80        | 99.4       | 8.61        |
| 3g       | 20:80        | 99.8       | 10.44       |
| 7a       | 20:80        | 98.0       | 6.37        |
| 7b       | 20:80        | 98.1       | 7.16        |
| 7c       | 20:80        | 99.0       | 8.19        |
| 7d       | 20:80        | 98.9       | 8.47        |
| 7e       | 20:80        | 99.3       | 6.85        |
| 9a       | 20:80        | 98.2       | 6.68        |
| 9b       | 20:80        | 98.7       | 6.87        |
| 9d       | 20:80        | 99.2       | 7.12        |
| 9e       | 20:80        | 98.6       | 7.45        |
| 9f       | 20:80        | 98.8       | 7.36        |
| 11b      | 20:80        | 98.3       | 7.59        |
| 11e      | 20:80        | 98.4       | 7.41        |
| 11f      | 20:80        | 99.3       | 7.37        |

Mobile phase: solvent A, acetonitrile; solvent B, H<sub>2</sub>O; Detection Time: totally 20 min; Detection: 1254 nm; Column: Thermo 5 mm Hypersil ODS (250 × 4.6 mm D.I.); Flow rate: 0.80 mL/min.

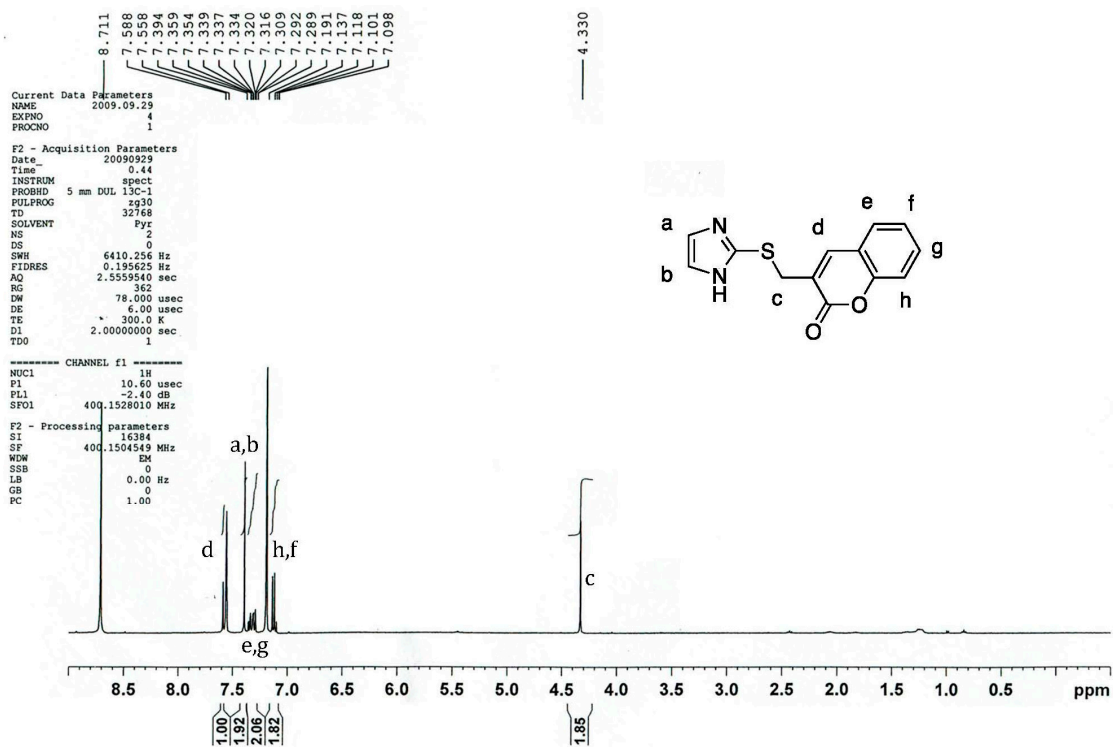Figure S1. <sup>1</sup>H NMR spectrum of compound 3a.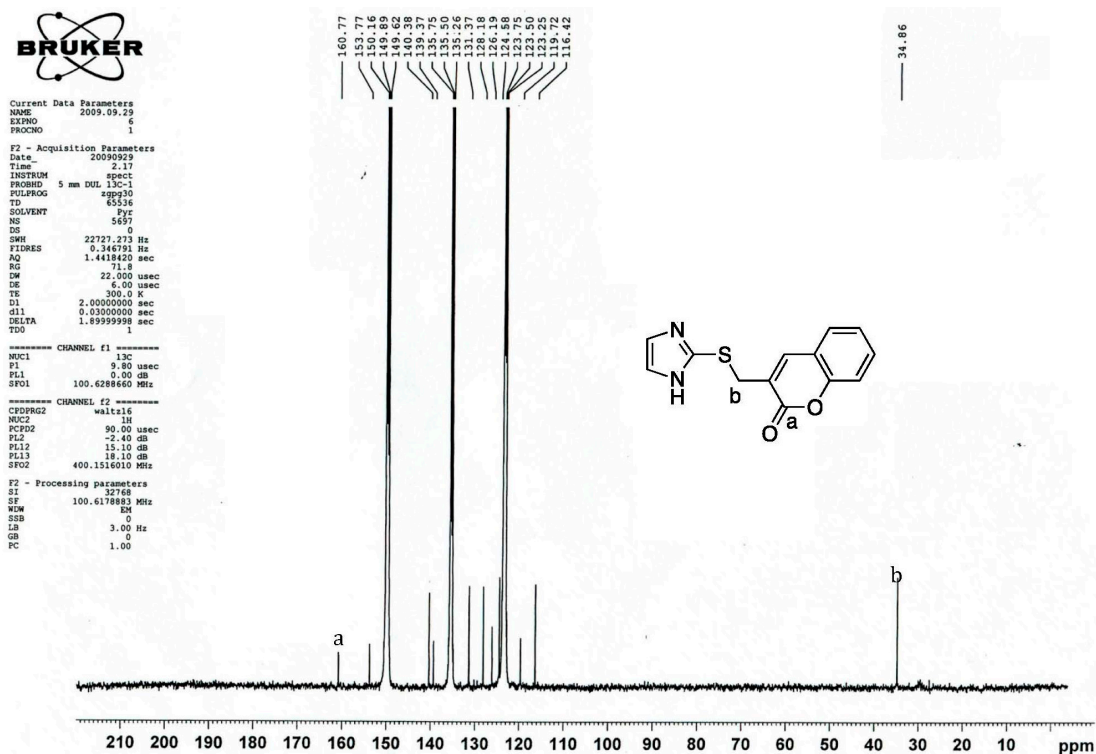Figure S2. <sup>13</sup>C NMR spectrum of compound 3a.

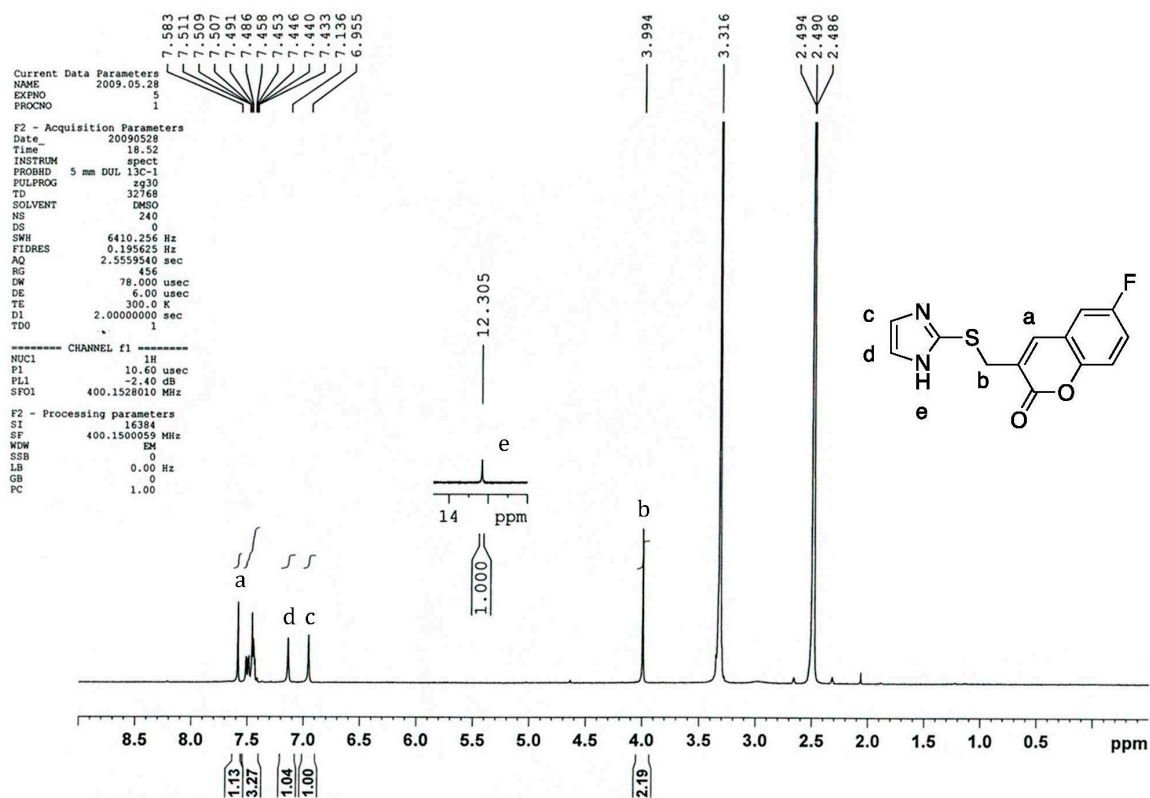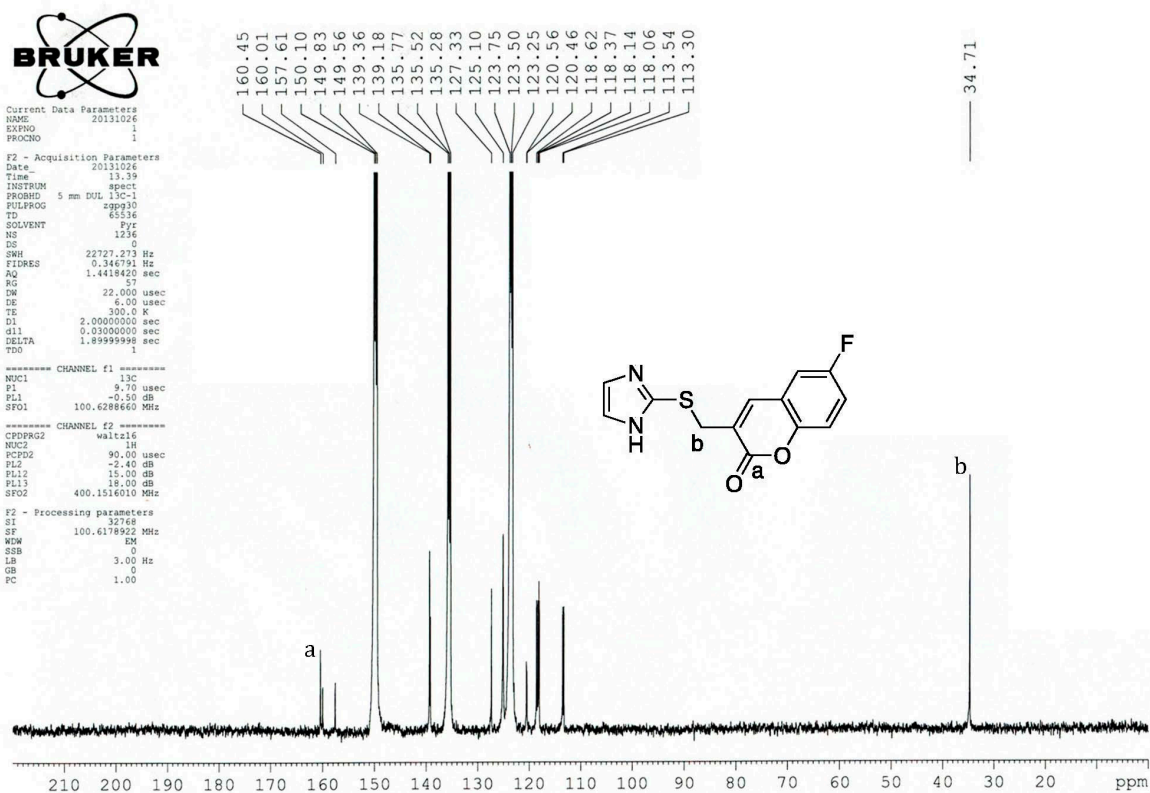

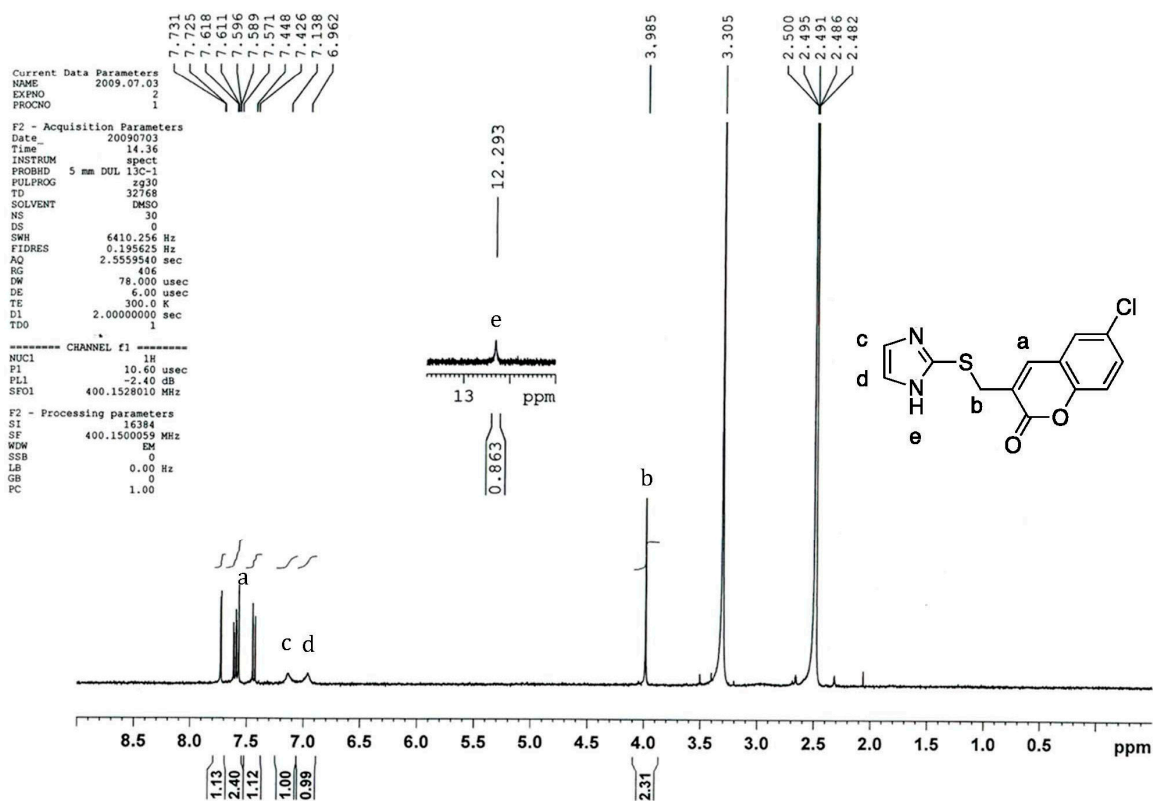Figure S5. <sup>1</sup>H NMR spectrum of compound 3c.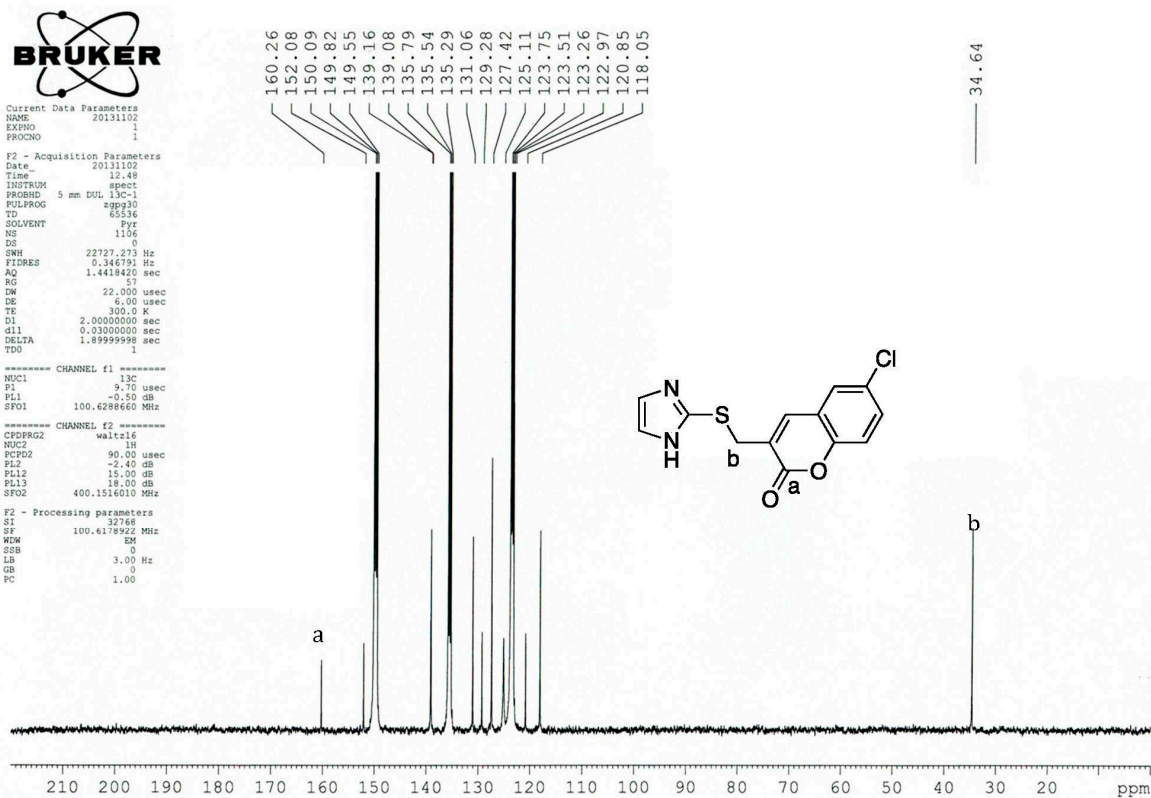Figure S6. <sup>13</sup>C NMR spectrum of compound 3c.

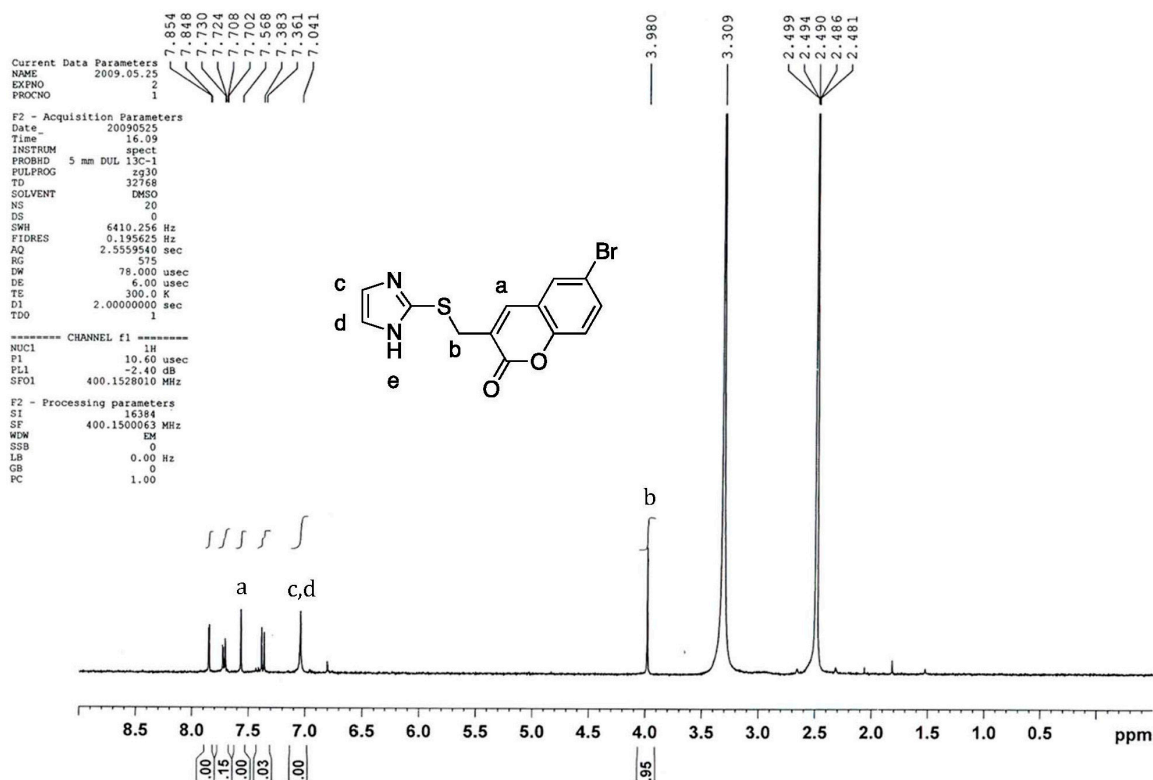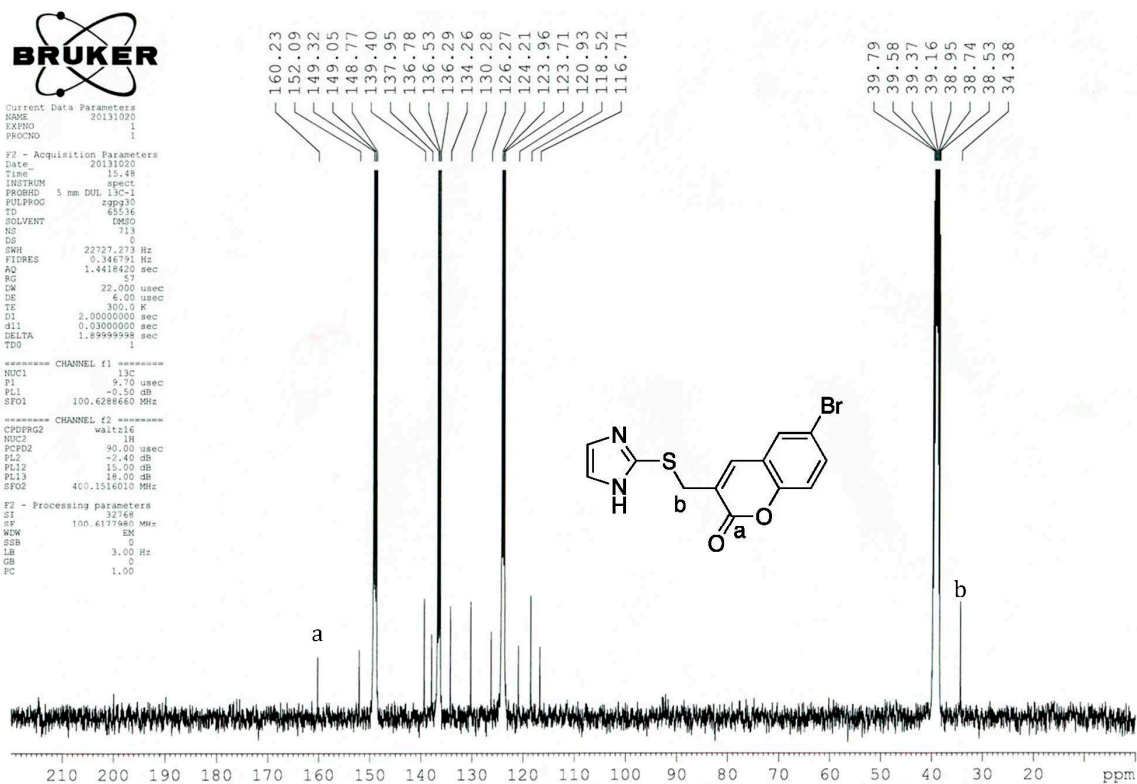

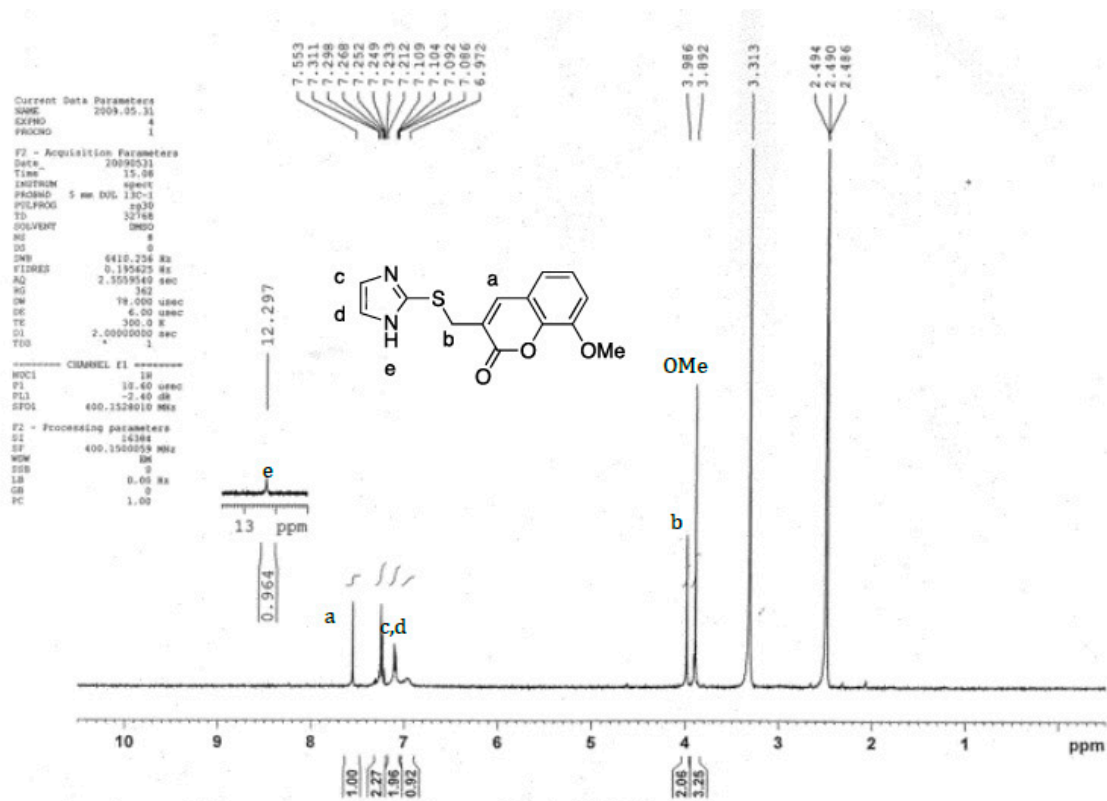Figure S9. <sup>1</sup>H NMR spectrum of compound 3e.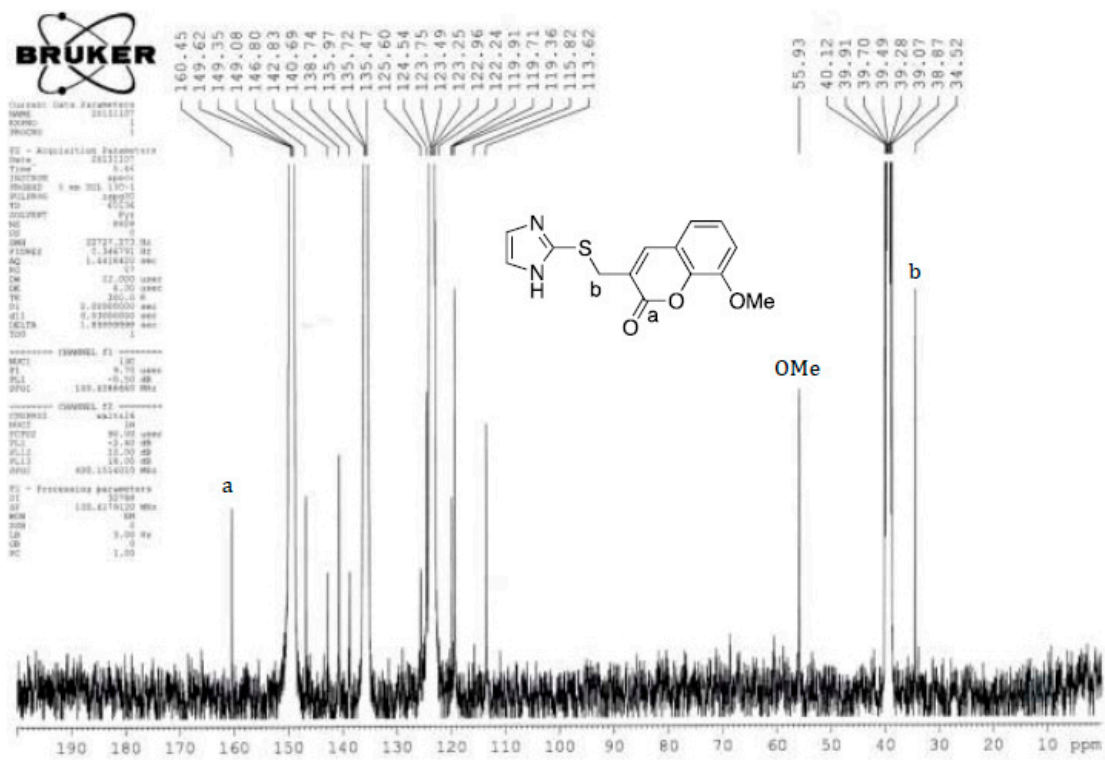Figure S10. <sup>13</sup>C NMR spectrum of compound 3e.

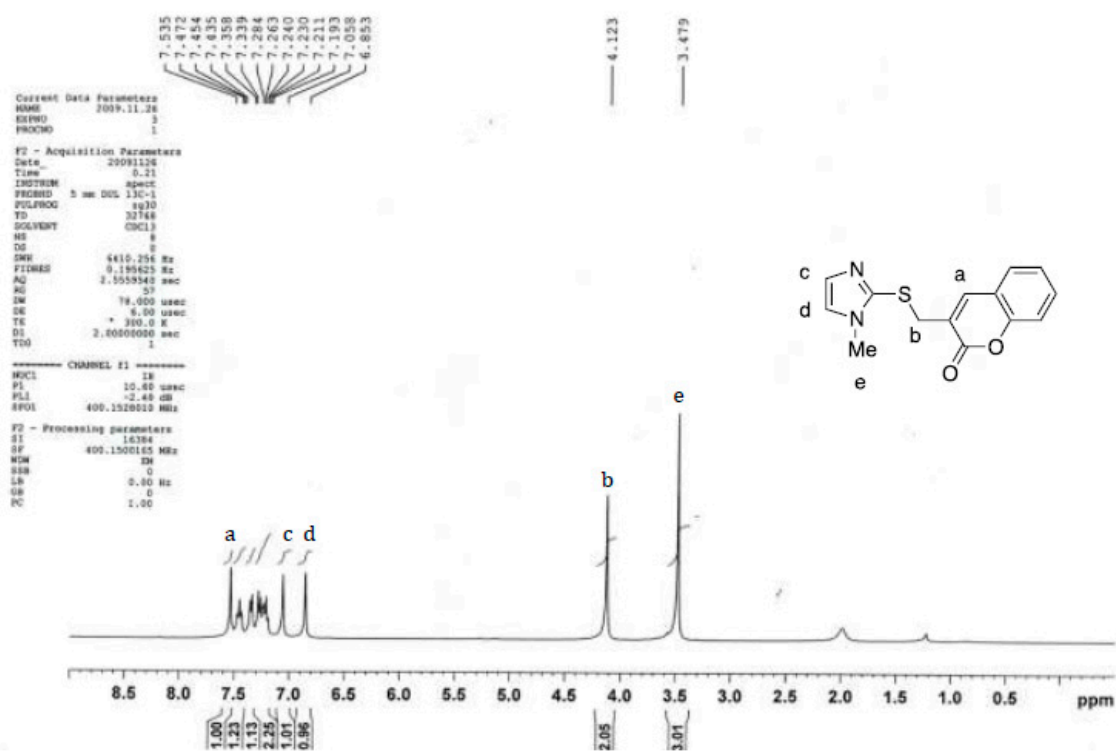Figure S11. <sup>1</sup>H NMR spectrum of compound 3f.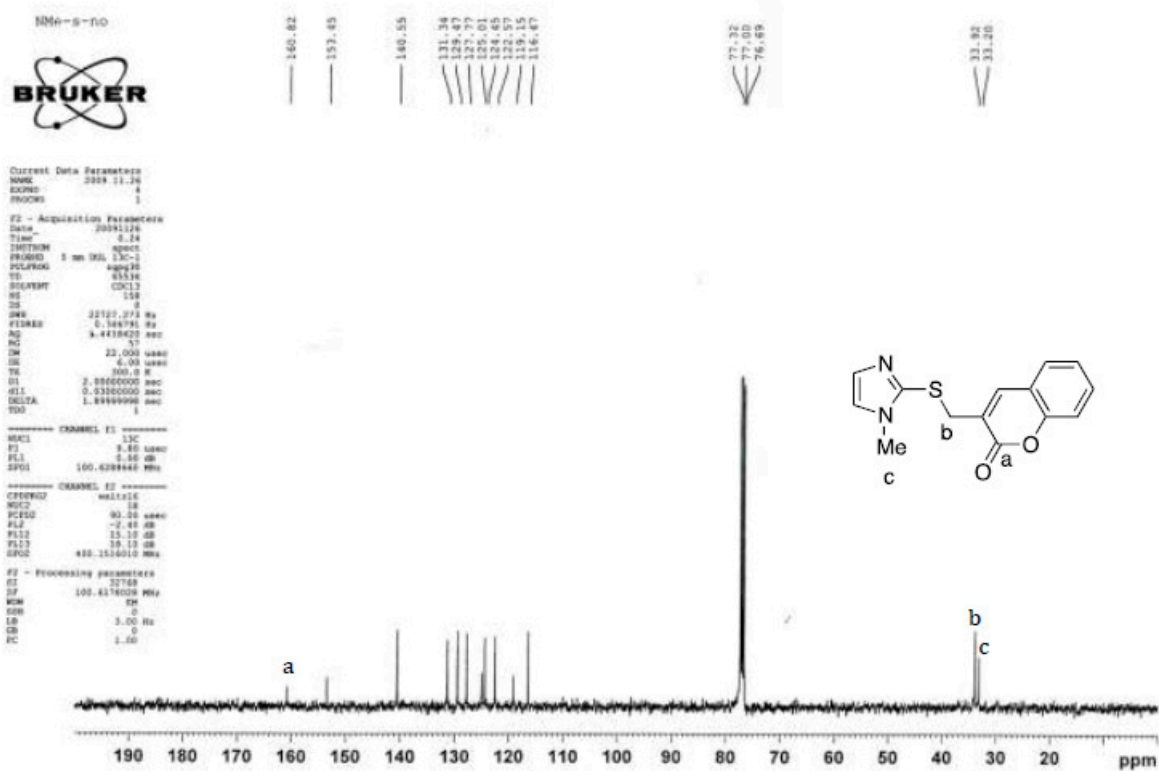Figure S12. <sup>13</sup>C NMR spectrum of compound 3f.

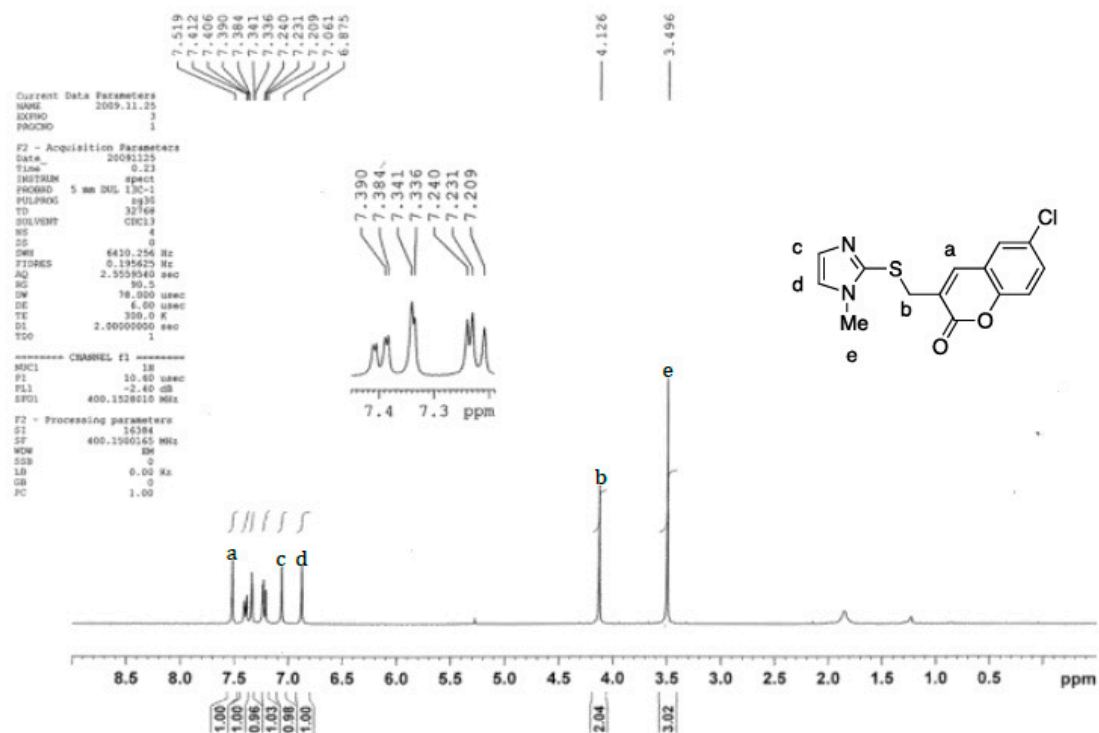Figure S13.  $^1\text{H}$  NMR spectrum of compound 3g.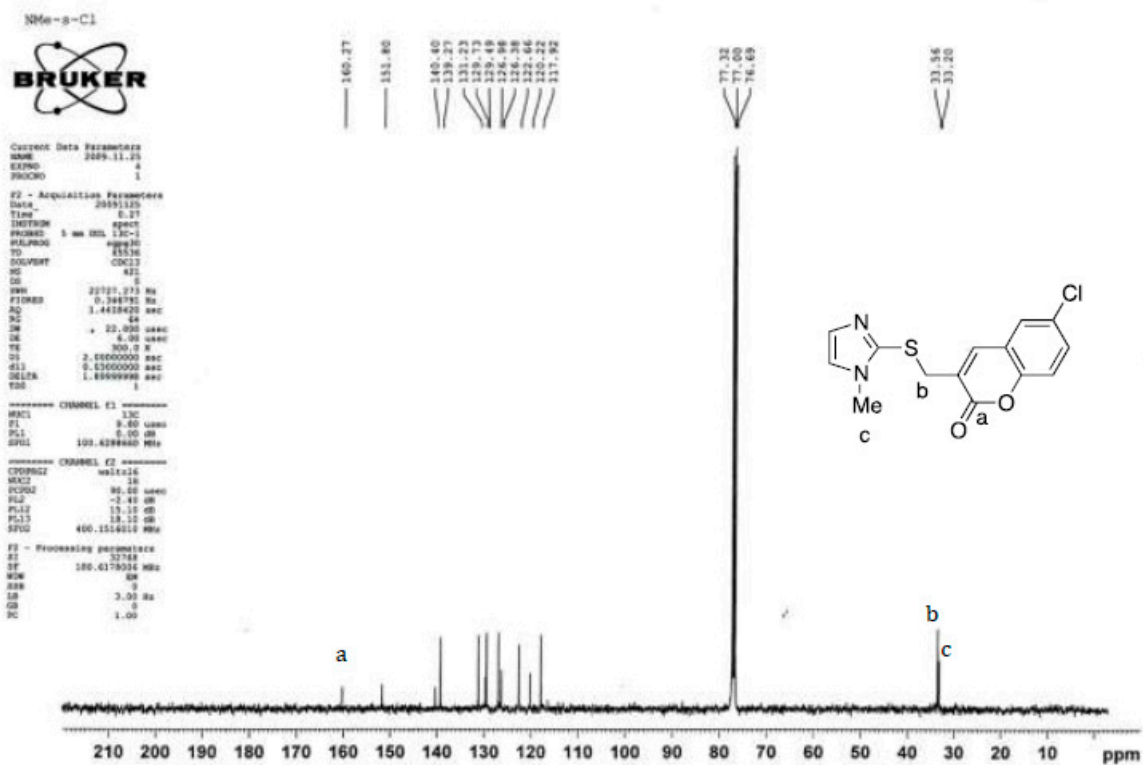Figure S14.  $^{13}\text{C}$  NMR spectrum of compound 3g.



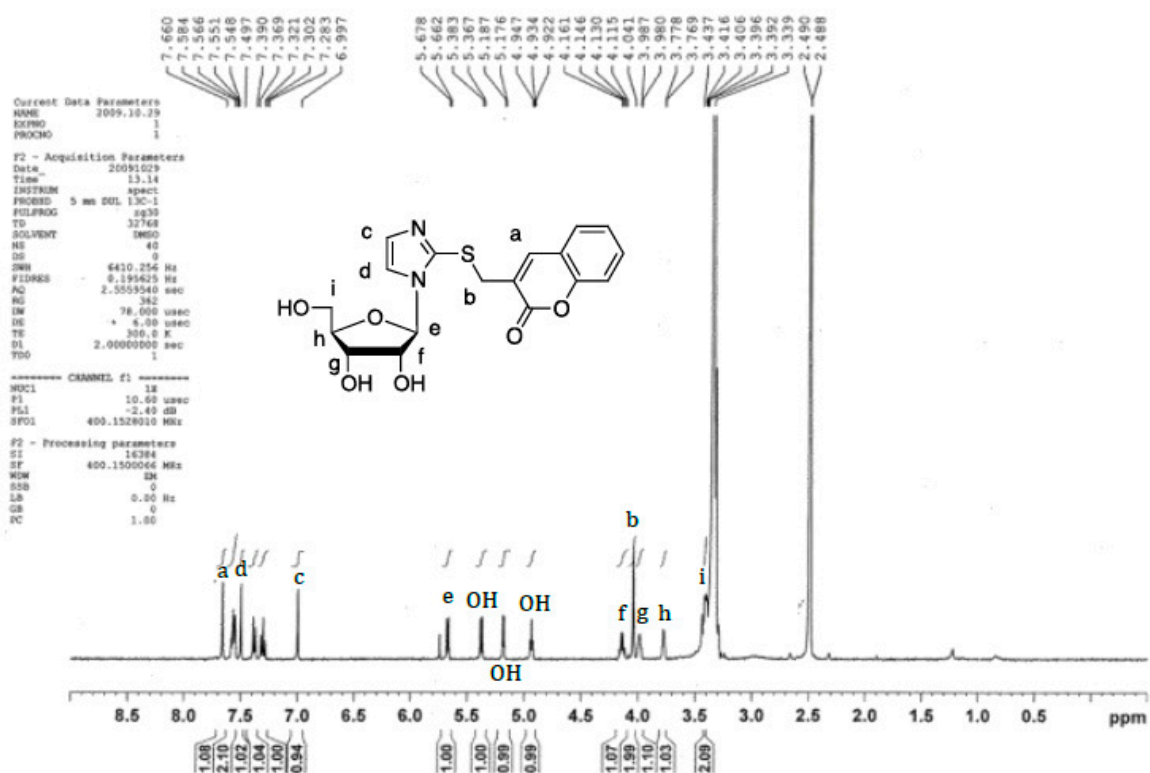Figure S15.  $^1\text{H}$  NMR spectrum of compound 7a.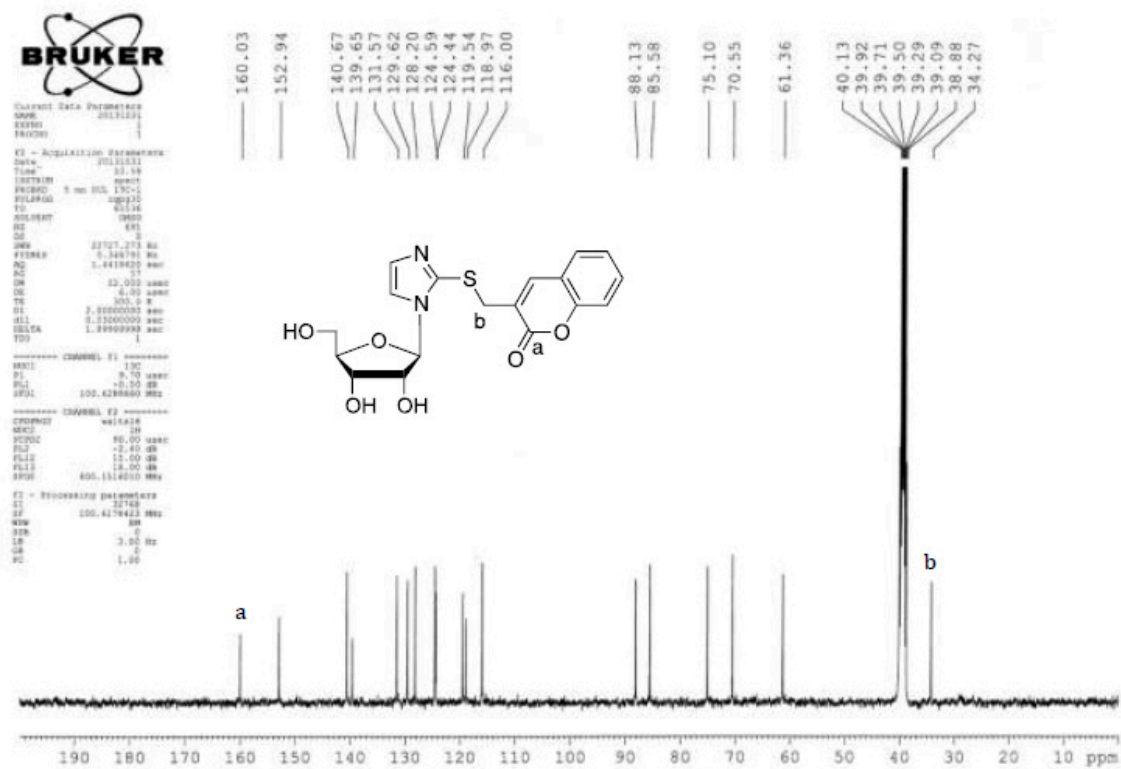Figure S16.  $^{13}\text{C}$  NMR spectrum of compound 7a.

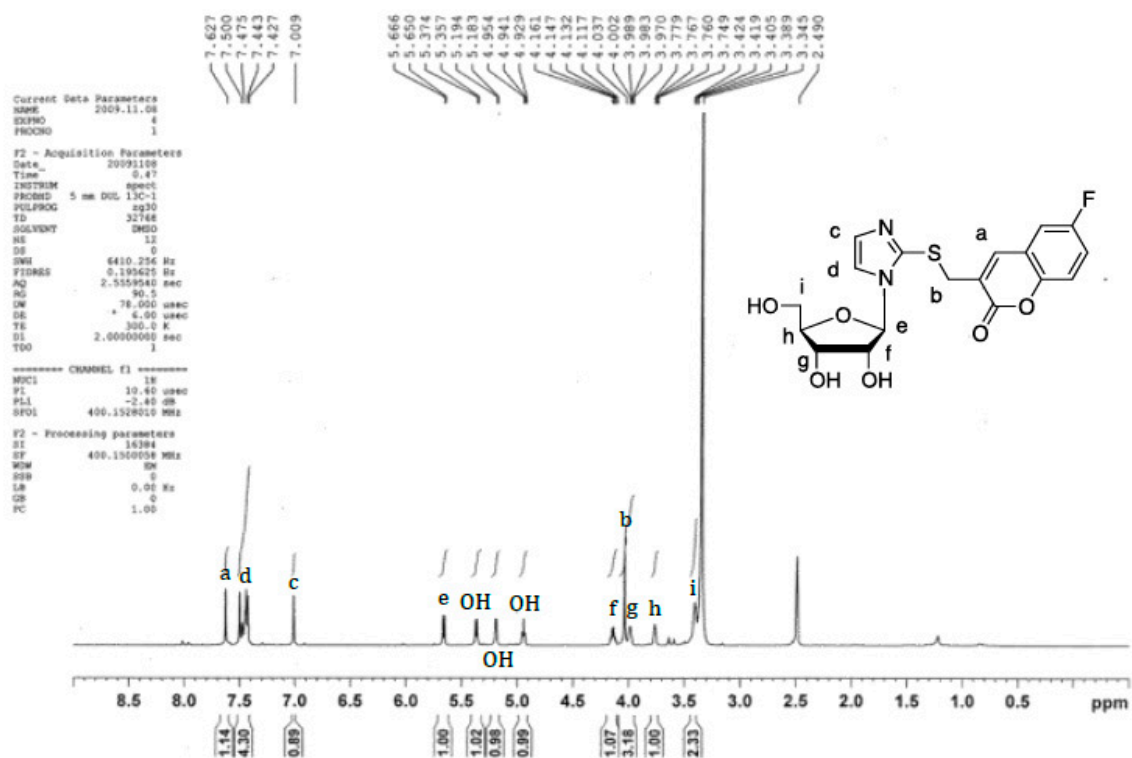Figure S17.  $^1\text{H}$  NMR spectrum of compound 7b.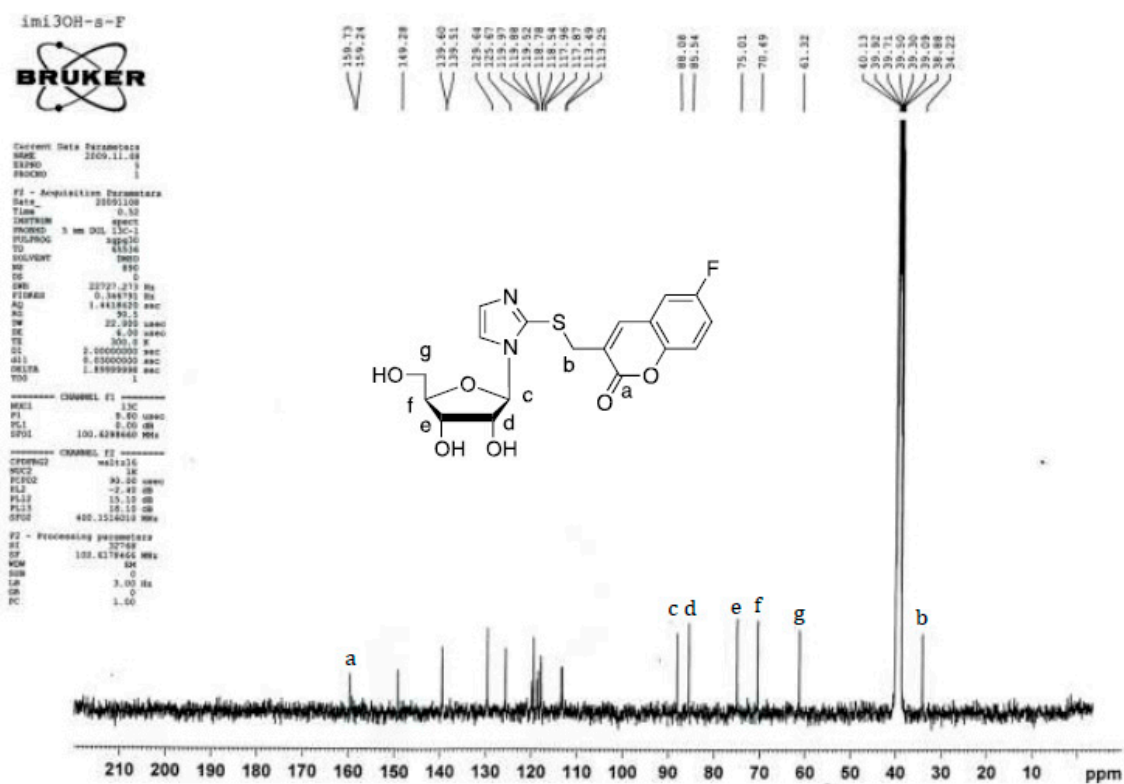Figure S18.  $^{13}\text{C}$  NMR spectrum of compound 7b.

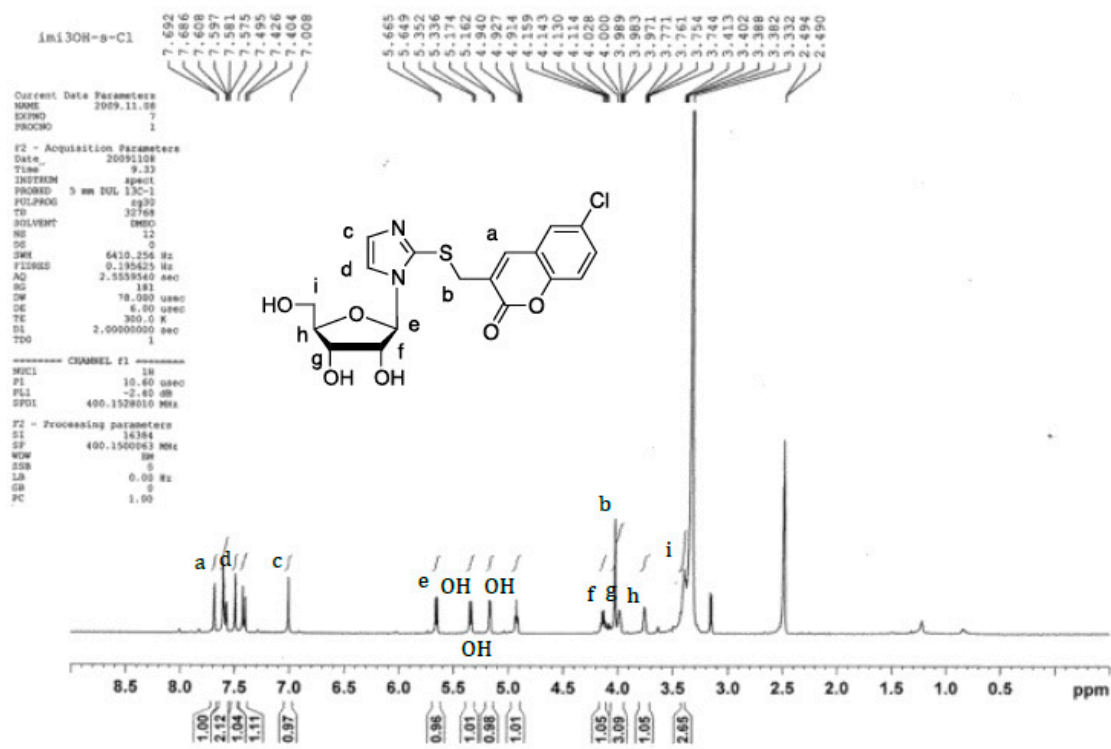Figure S19. <sup>1</sup>H NMR spectrum of compound 7c.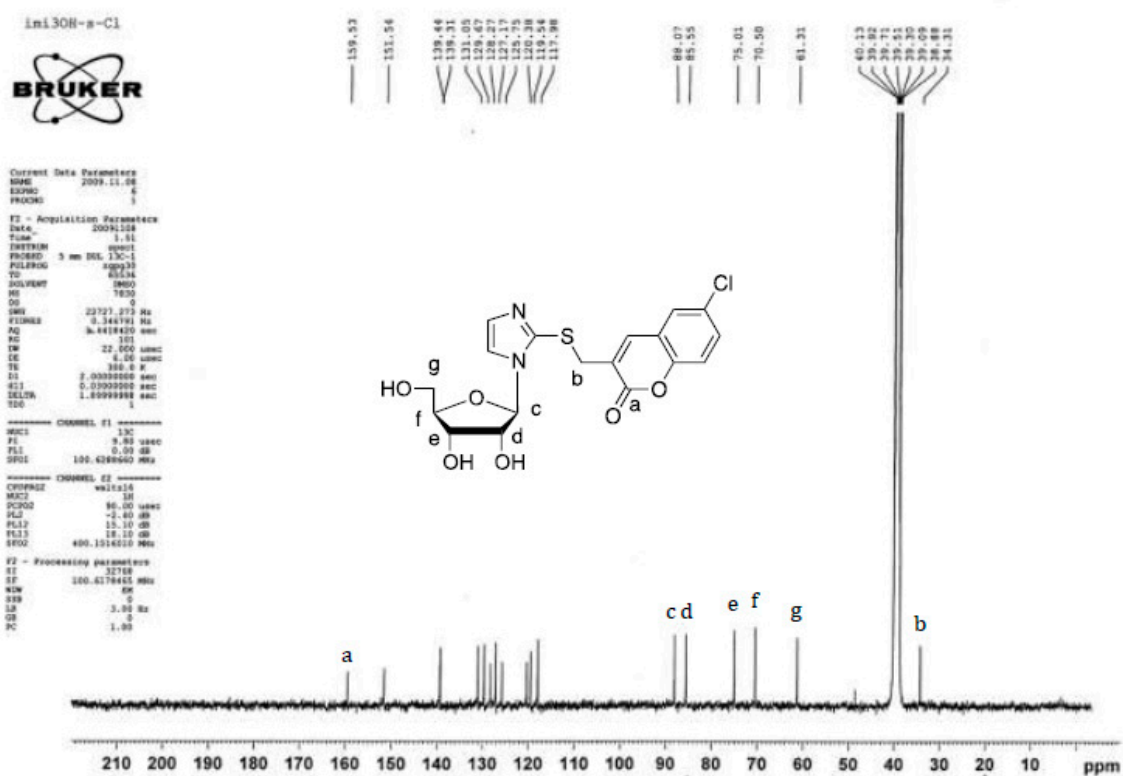Figure S20. <sup>13</sup>C NMR spectrum of compound 7c.

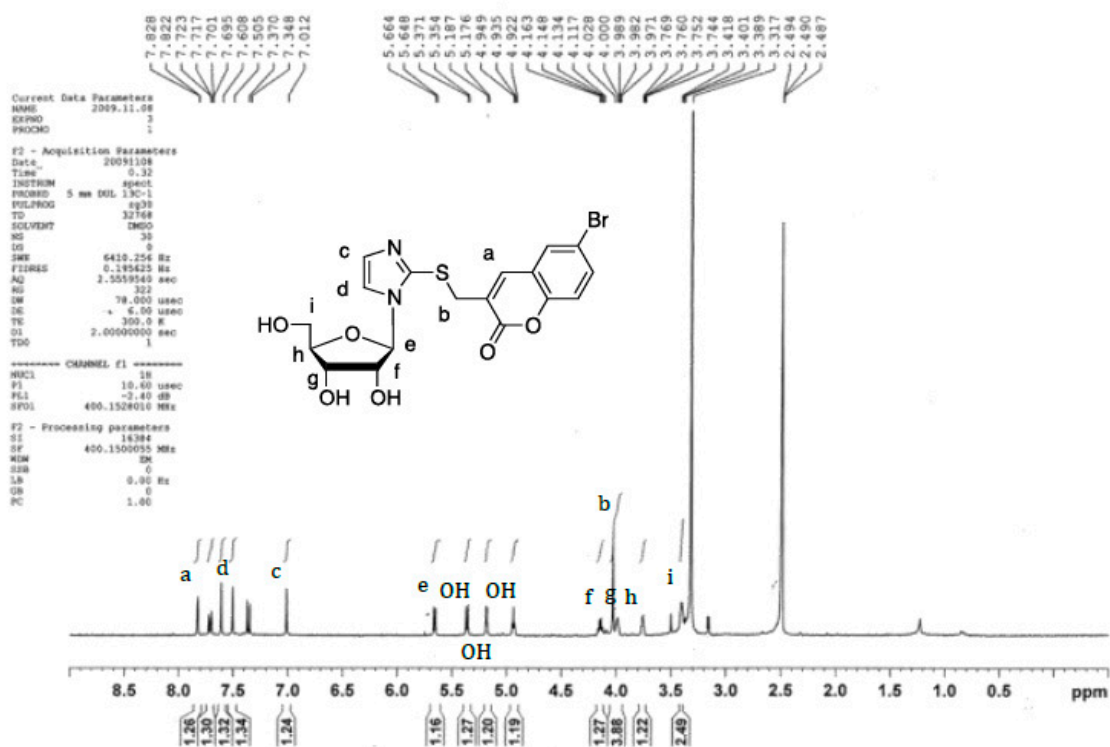Figure S21. <sup>1</sup>H NMR spectrum of compound 7d.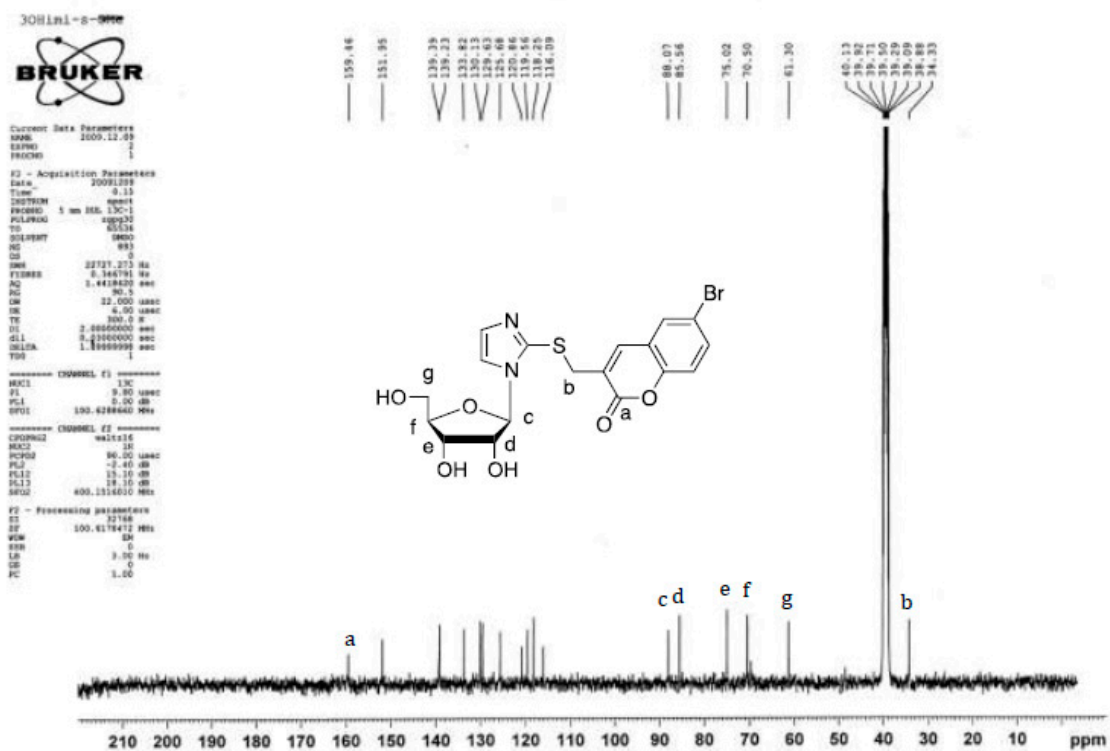Figure S22. <sup>13</sup>C NMR spectrum of compound 7d.



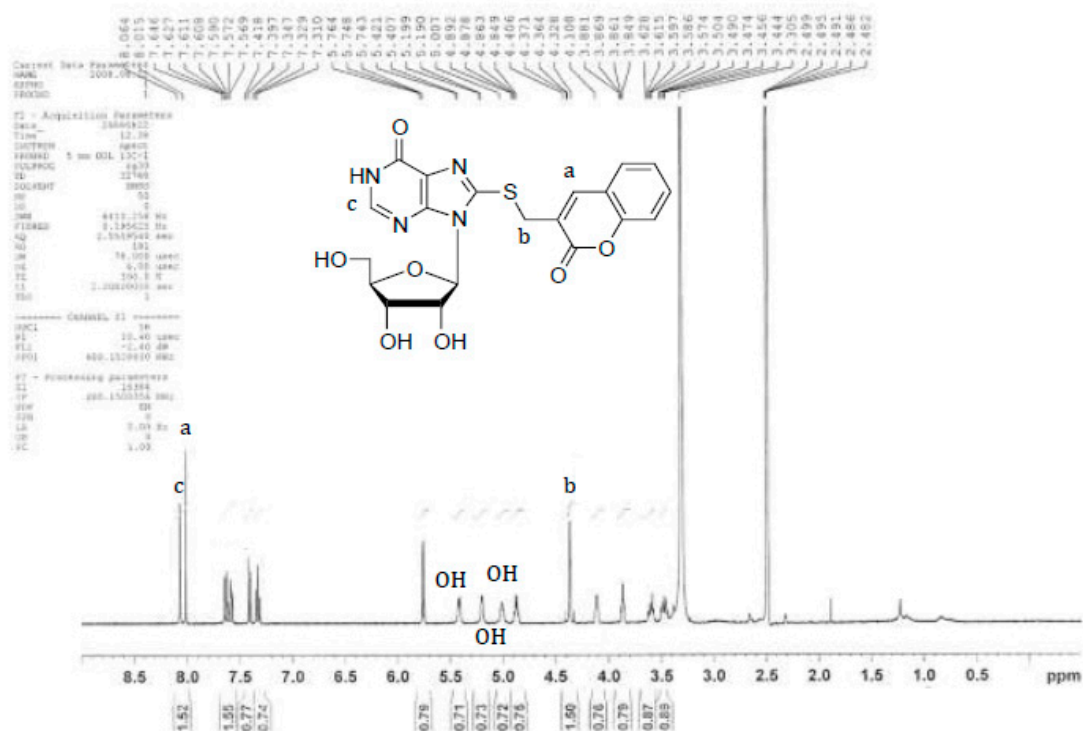Figure S25. <sup>1</sup>H NMR spectrum of compound 9a.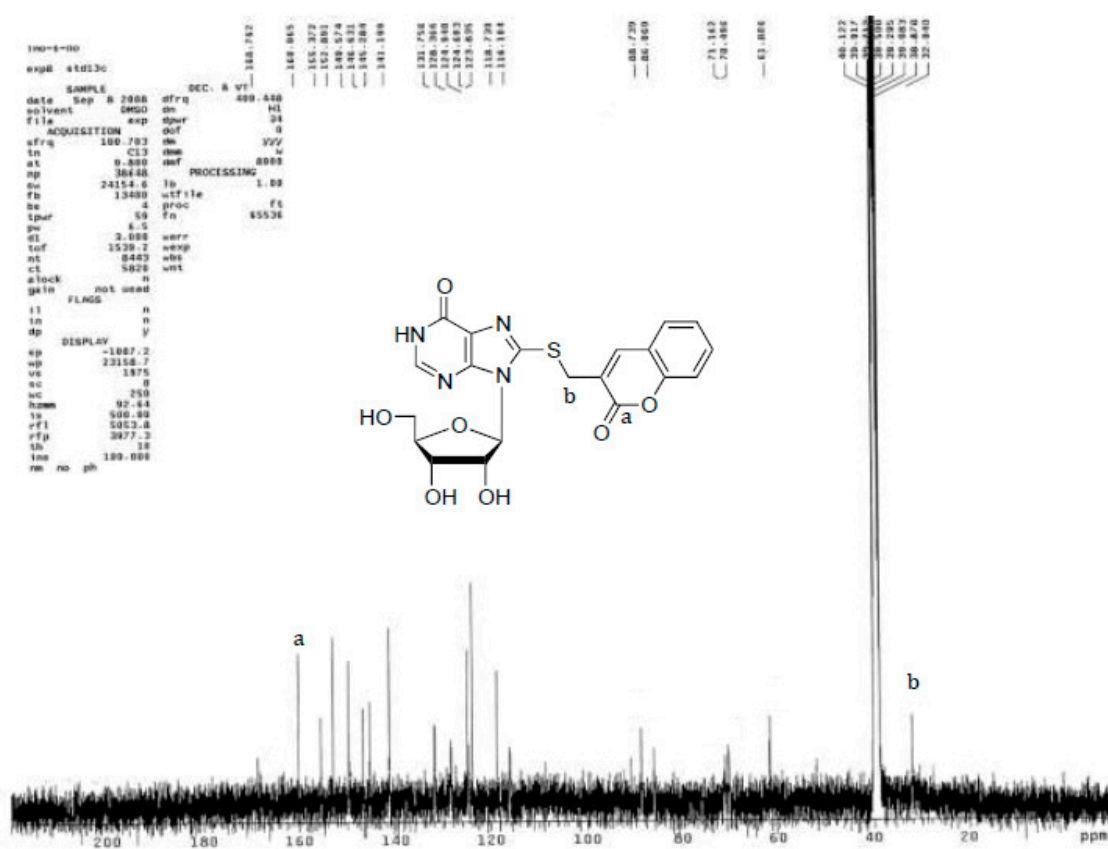Figure S26. <sup>13</sup>C NMR spectrum of compound 9a.

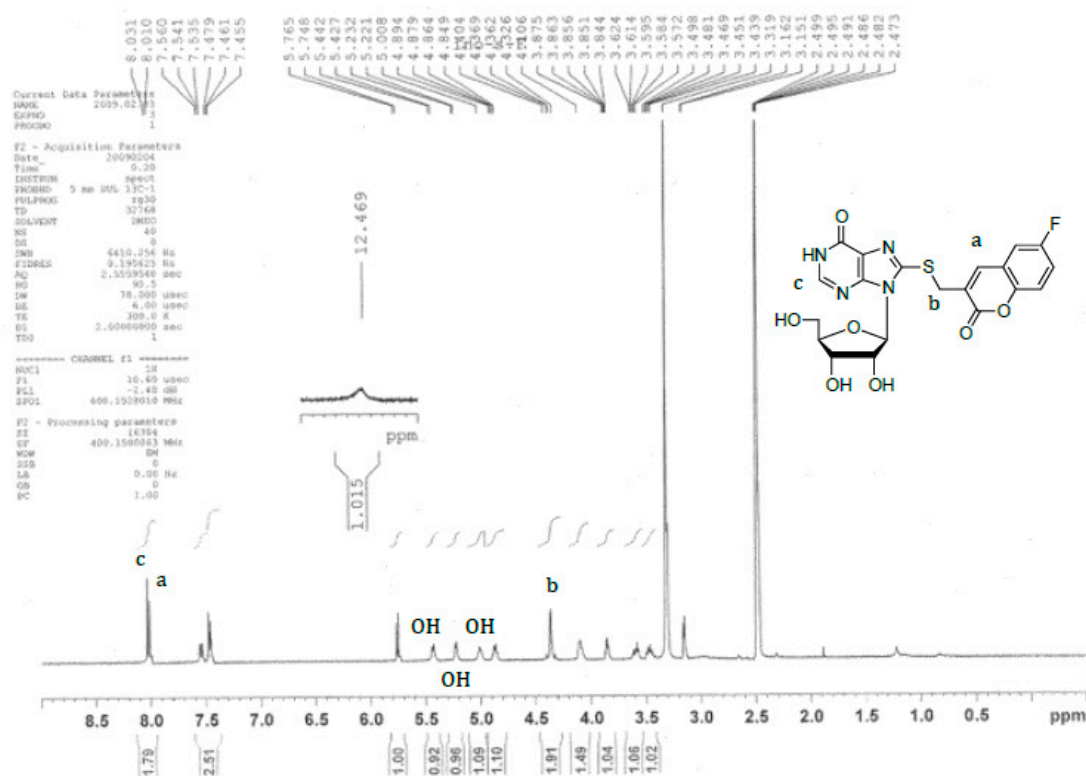Figure S27. <sup>1</sup>H NMR spectrum of compound 9b.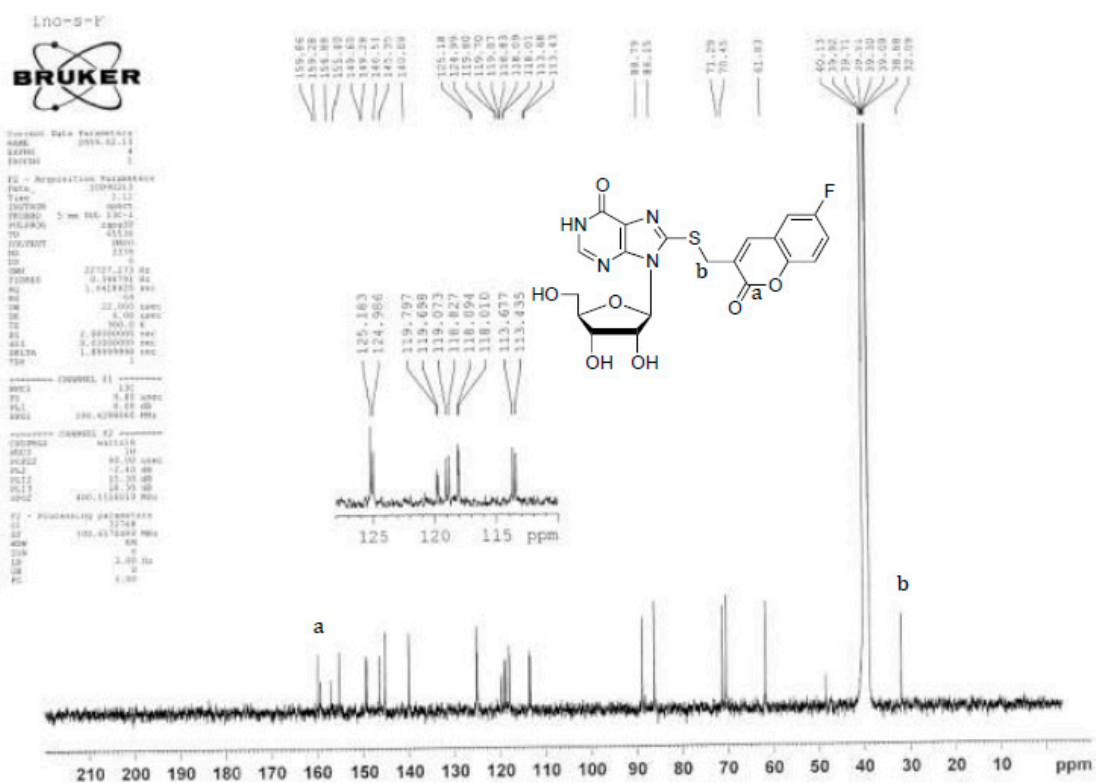Figure S28. <sup>13</sup>C NMR spectrum of compound 9b.

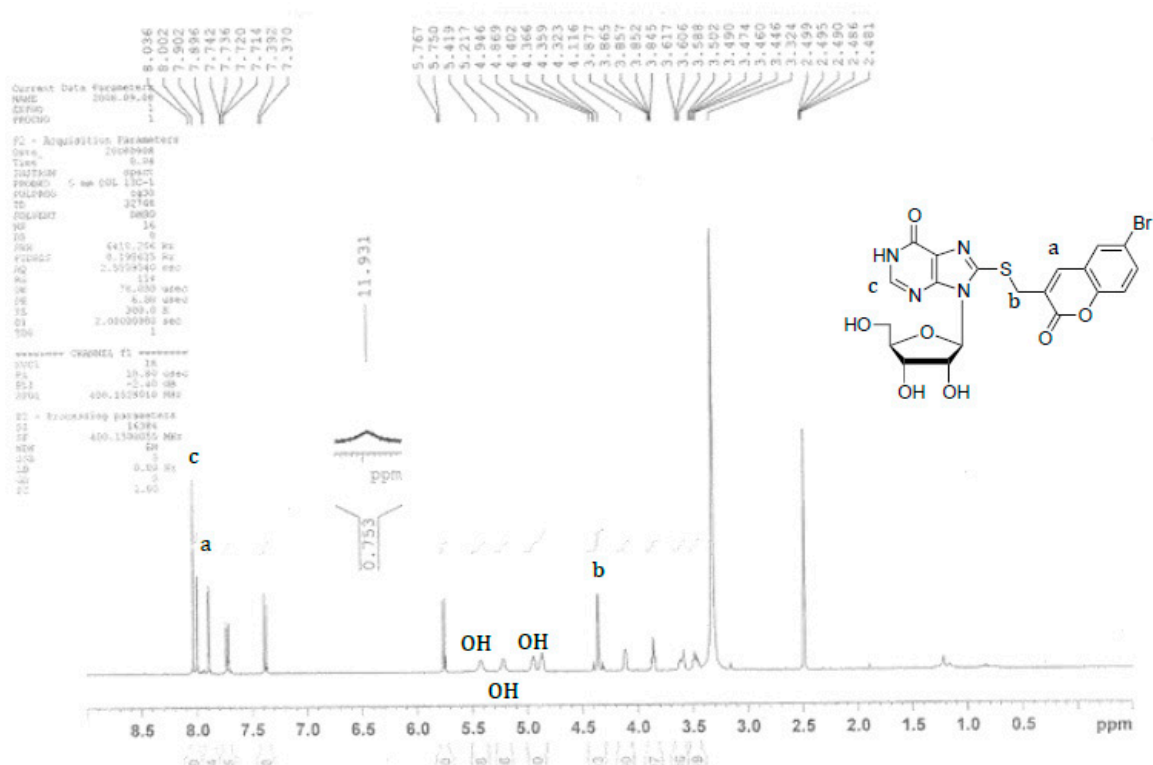Figure S29. <sup>1</sup>H NMR spectrum of compound 9d.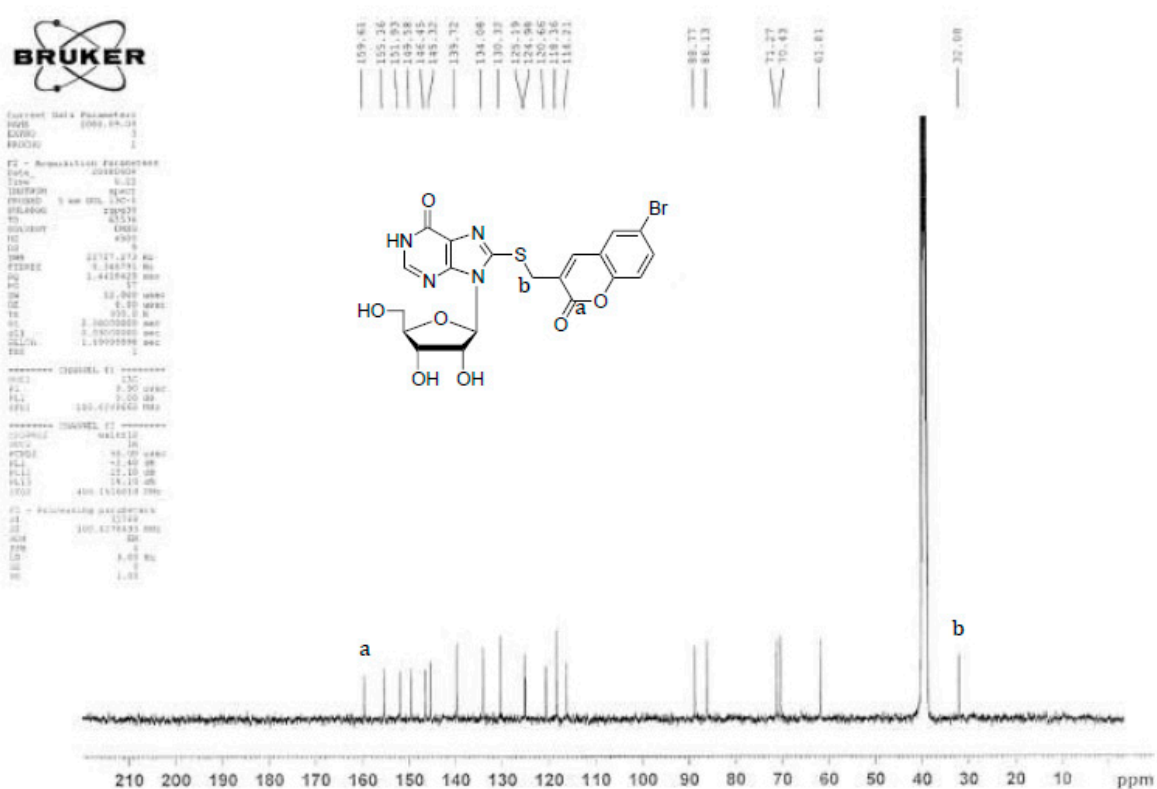Figure S30. <sup>13</sup>C NMR spectrum of compound 9d.



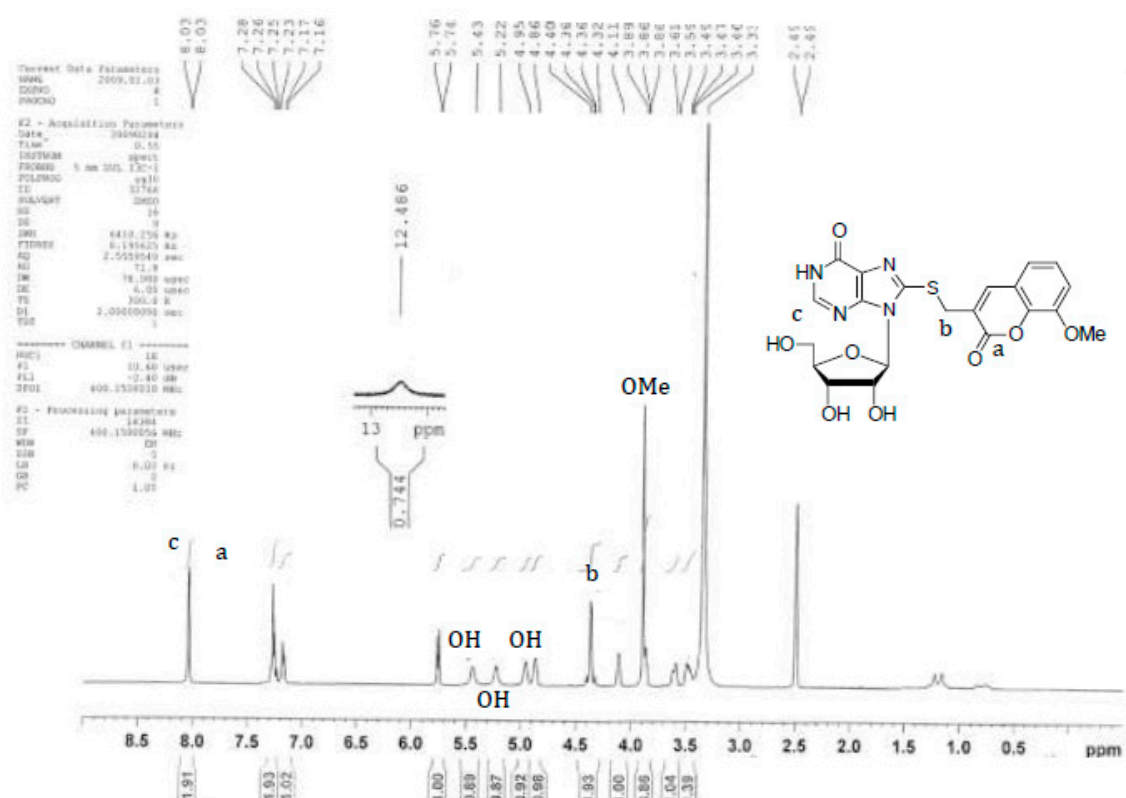

Figure S31. <sup>1</sup>H NMR spectrum of compound 9e.

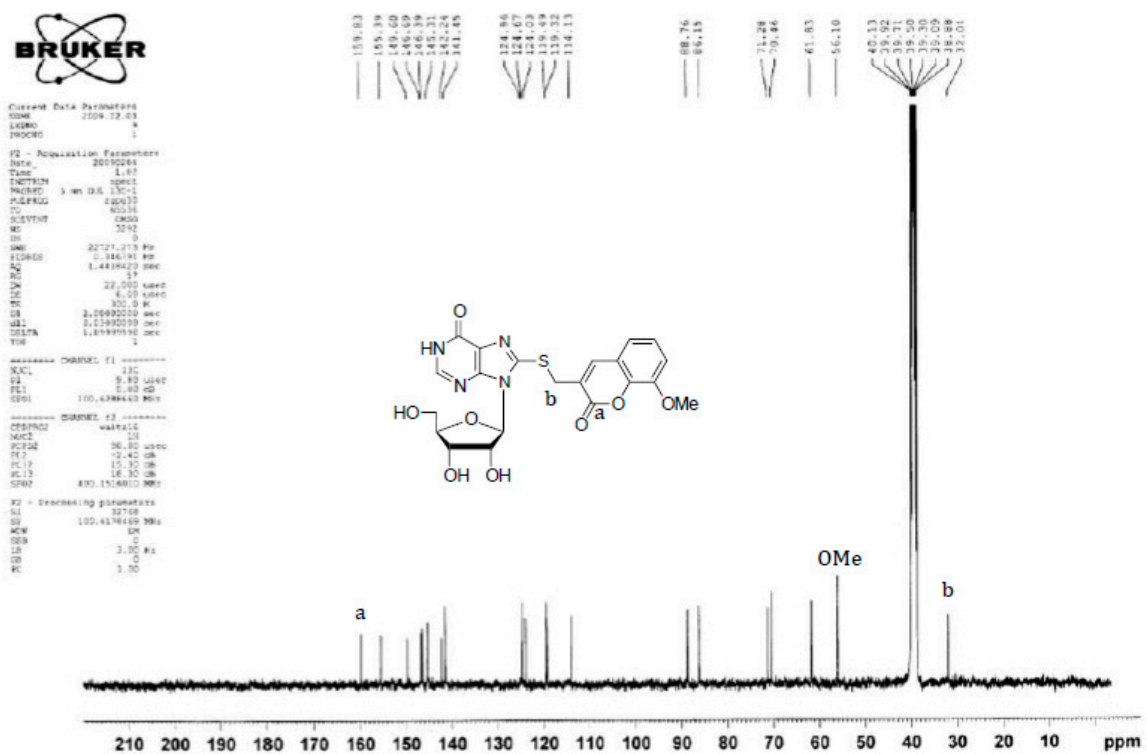

Figure S32. <sup>13</sup>C NMR spectrum of compound 9e.

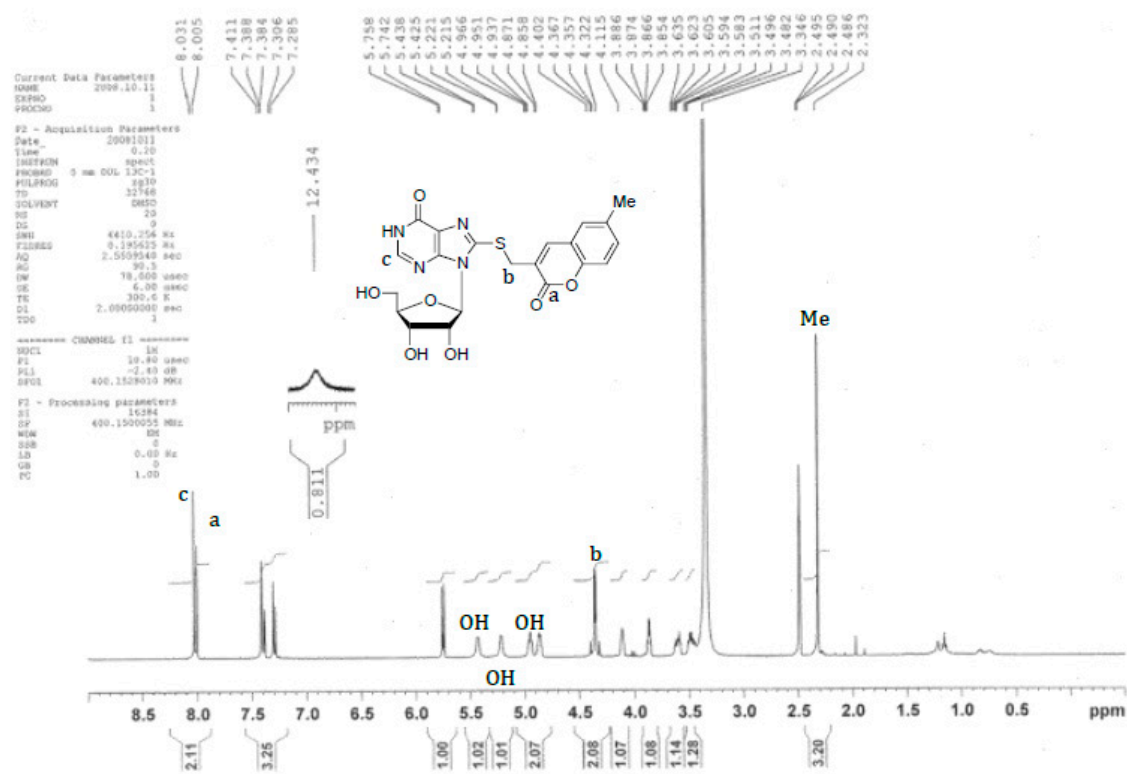

Figure S33. <sup>1</sup>H NMR spectrum of compound 9f.

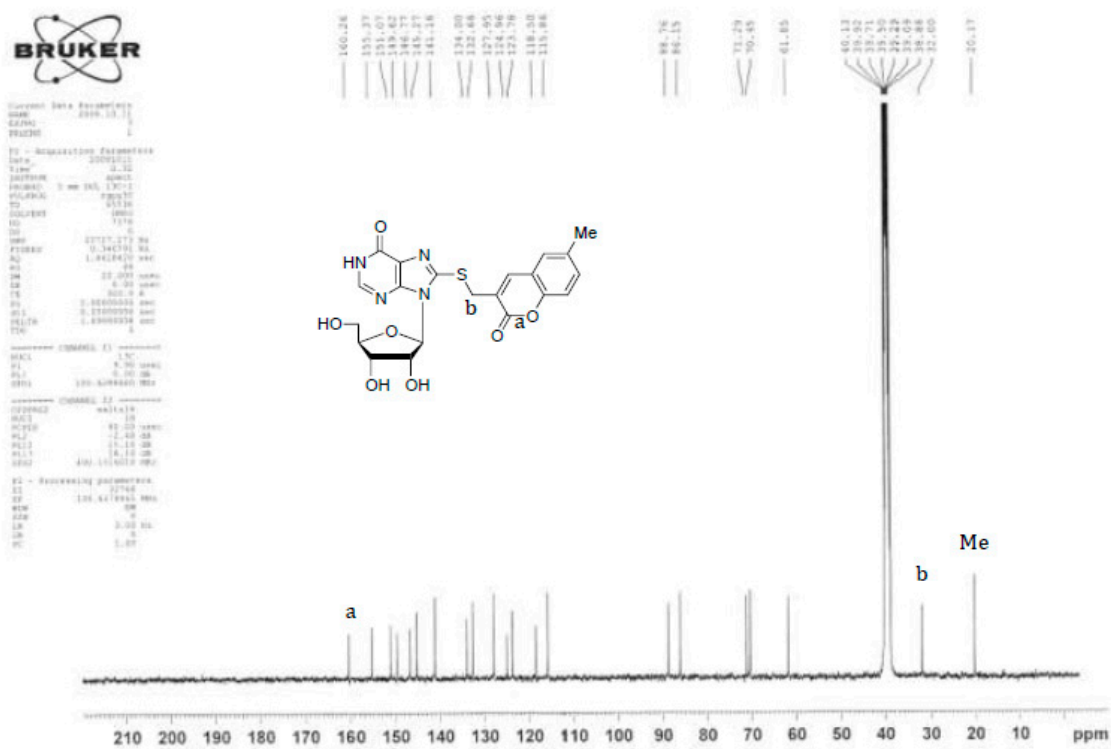

Figure S34. <sup>13</sup>C NMR spectrum of compound 9f.

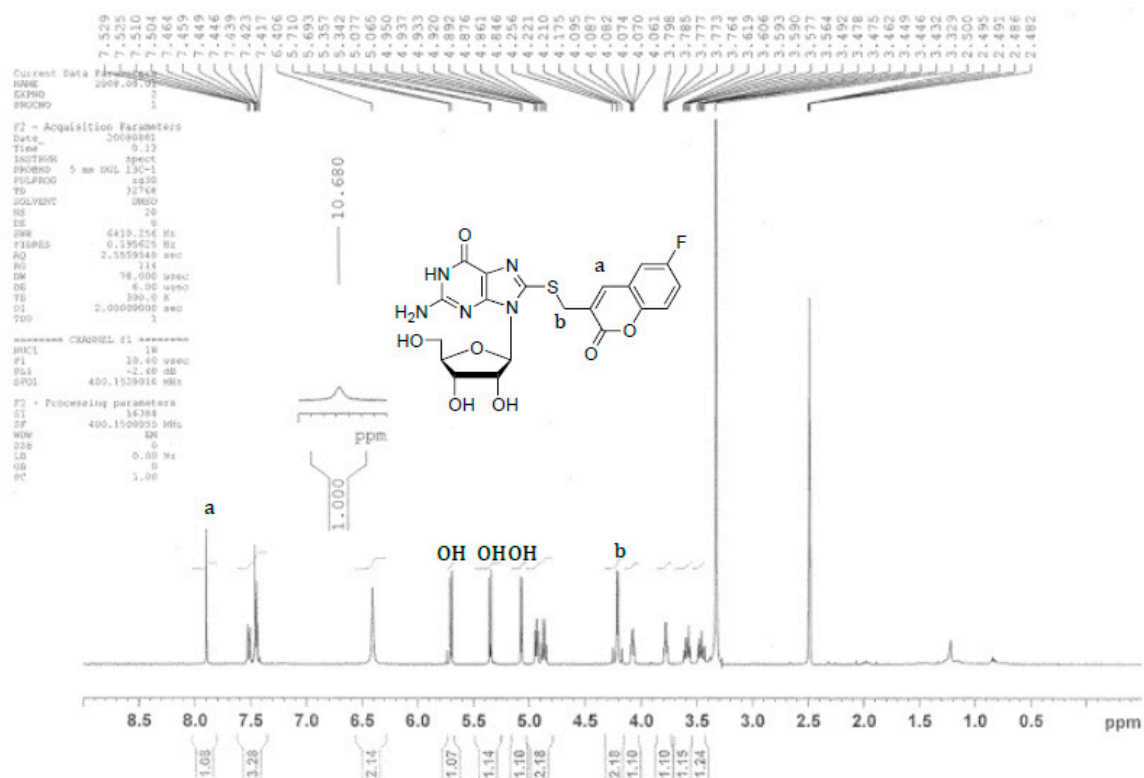Figure S35. <sup>1</sup>H NMR spectrum of compound 11b.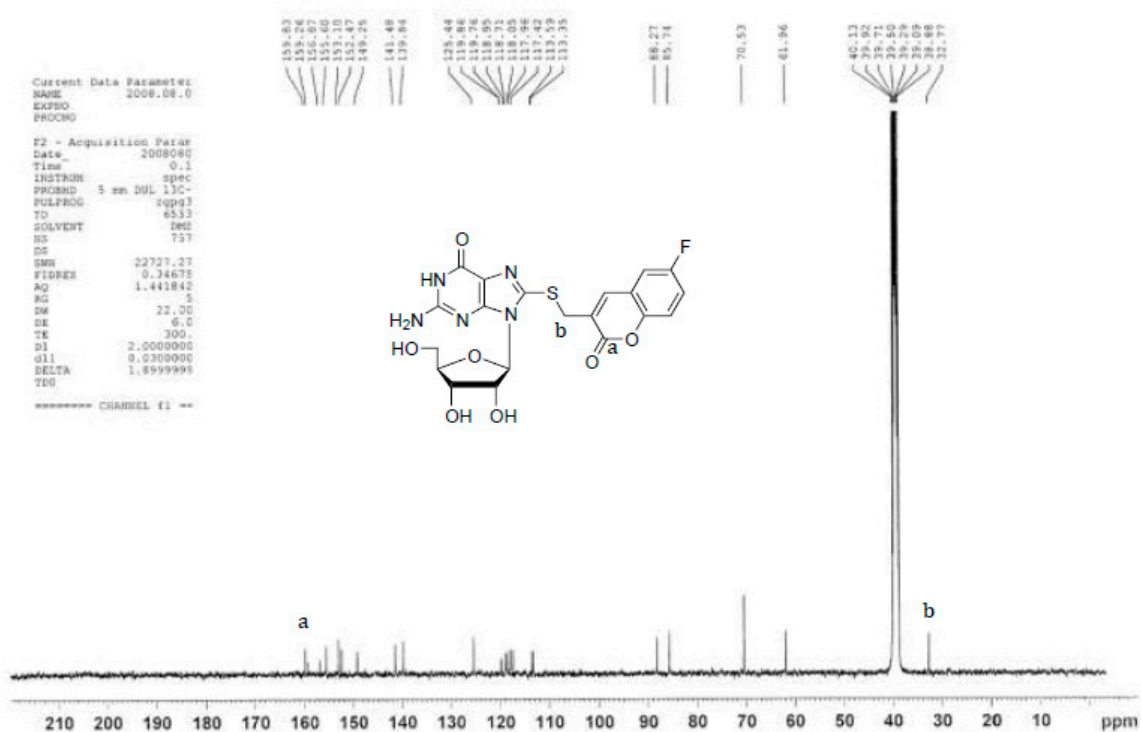Figure S36. <sup>13</sup>C NMR spectrum of compound 11b.

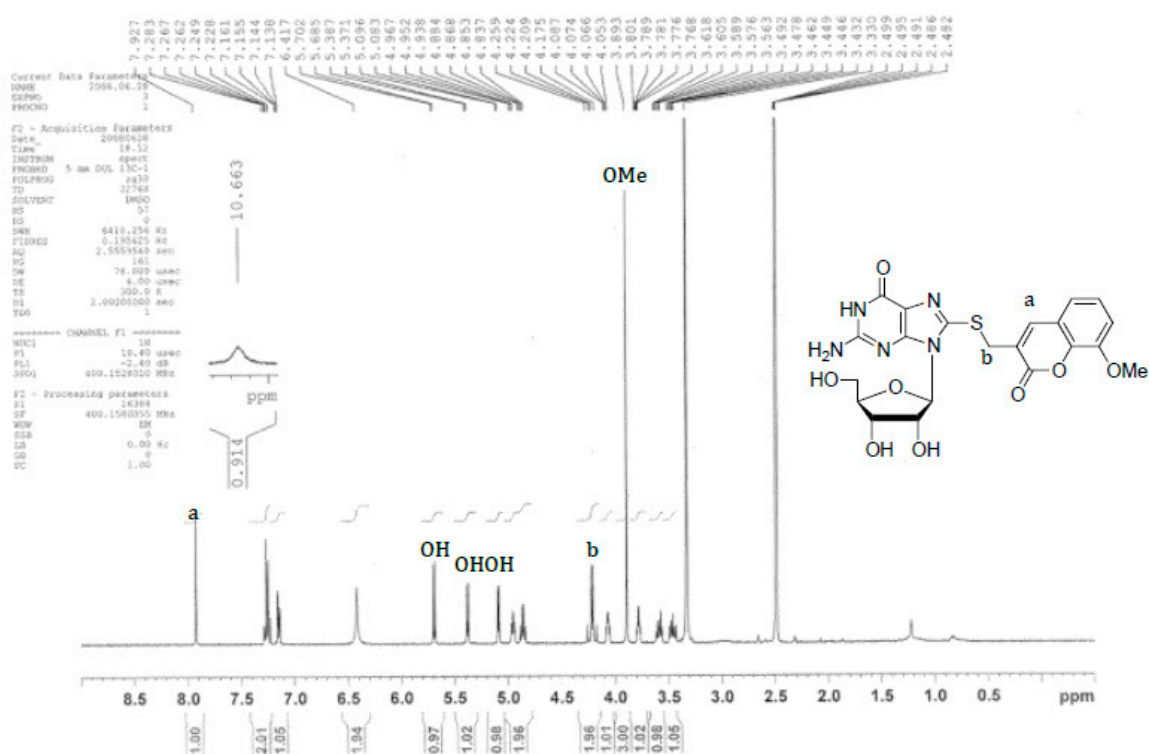Figure S37. <sup>1</sup>H NMR spectrum of compound 11e.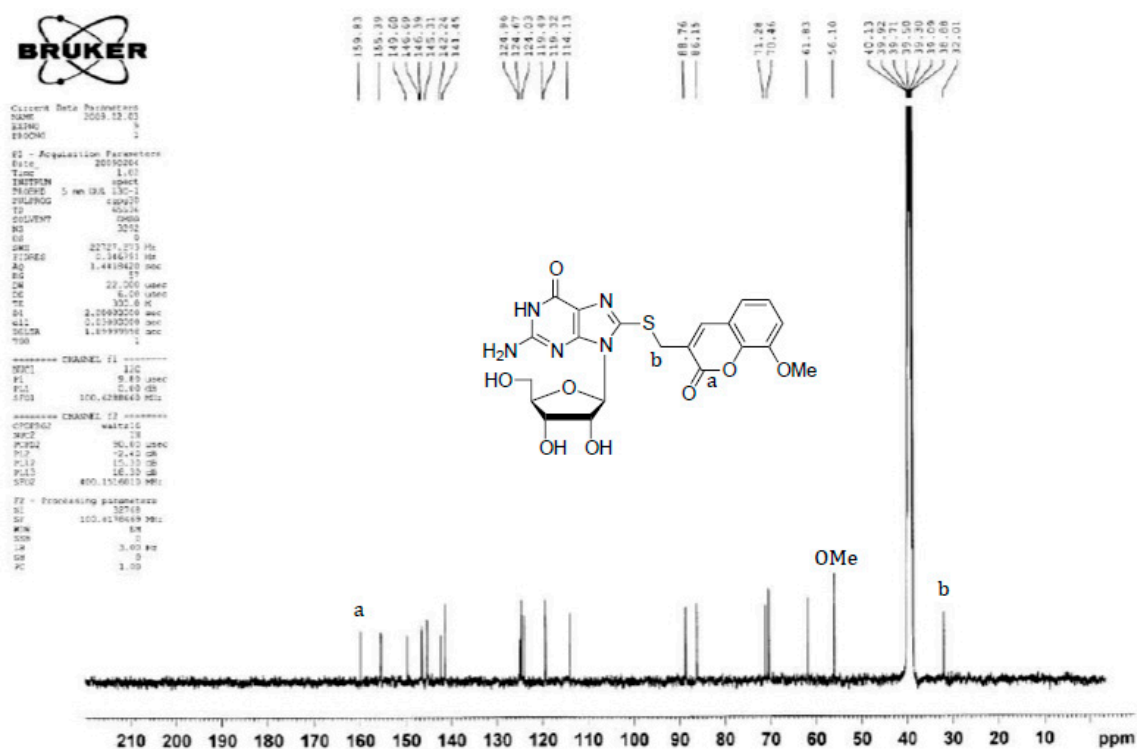Figure S38. <sup>13</sup>C NMR spectrum of compound 11e.

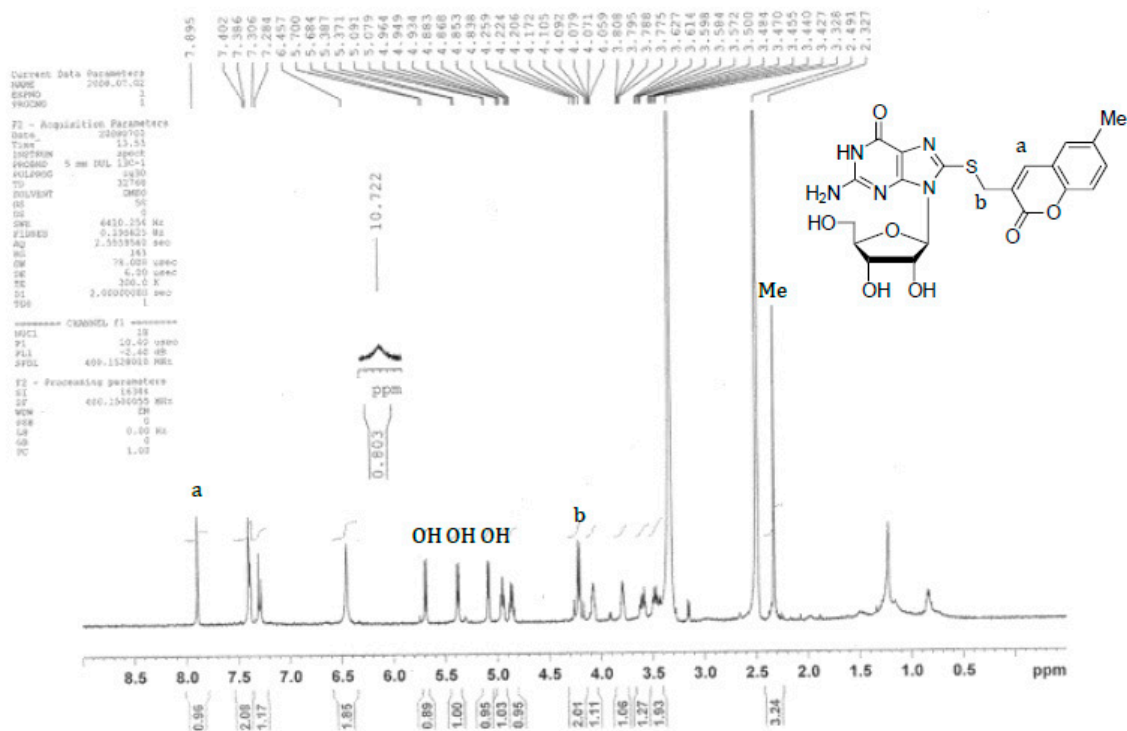Figure S39. <sup>1</sup>H NMR spectrum of compound 11f.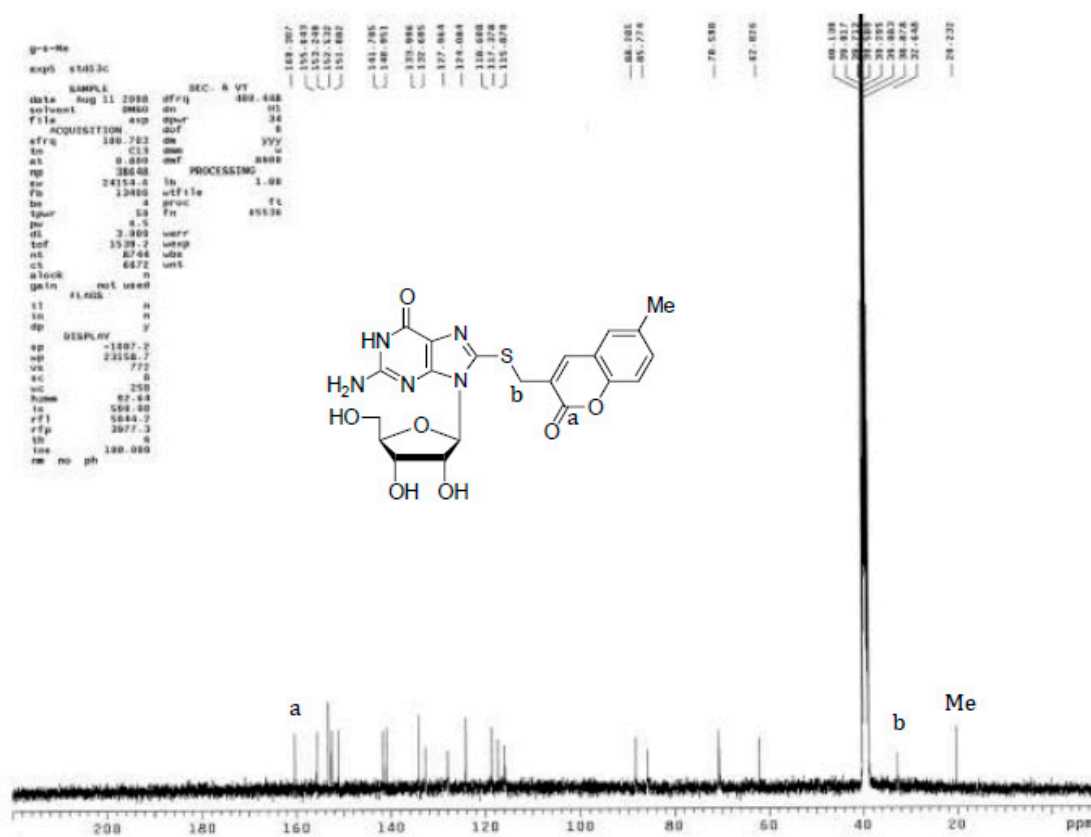Figure S40. <sup>13</sup>C NMR spectrum of compound 11f.
